# Supplementary material for: Differential infection outcome of Chlamydia trachomatis in human blood monocytes and monocyte-derived dendritic cells
Source: PubMed Central journal article supplement (PMC4236547; doi:10.1186/s12866-014-0209-3), 2014-08-14

**Figure S4 TNF**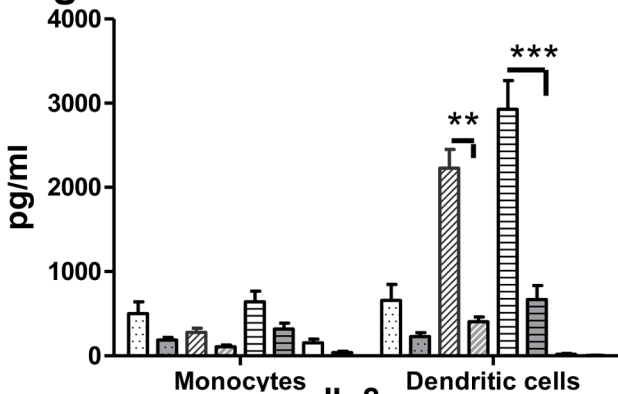**IL-1 $\beta$** 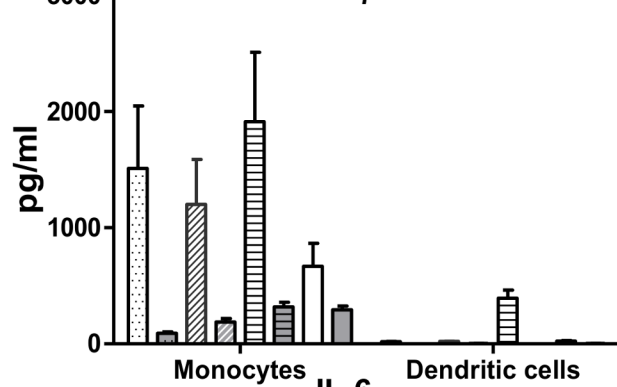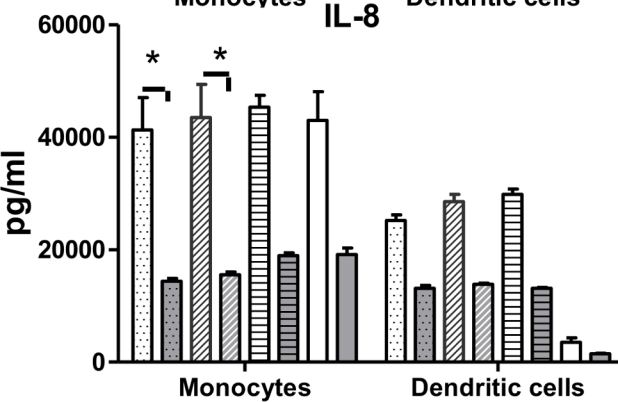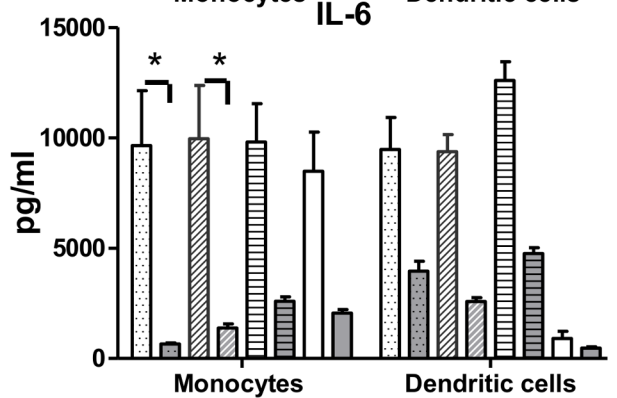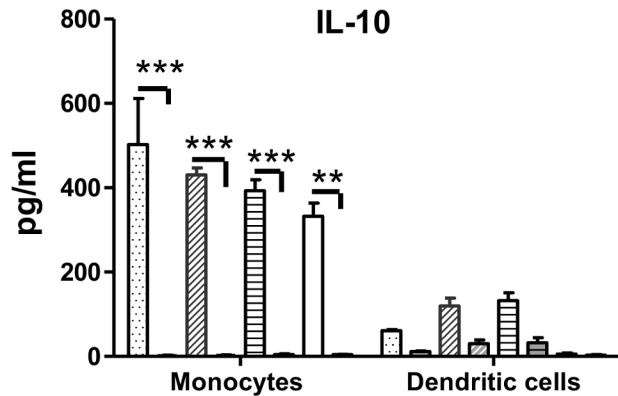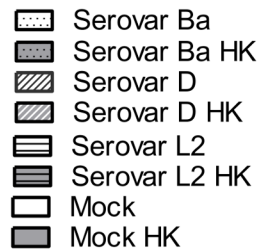

Supplement: s12866-014-0209-3-S4.pdf [file s12866-014-0209-3-S4.pdf]
